# Supplementary material for: Sleep Patterns Fluctuate Following Training and Games across the Season in a Semi-Professional, Female Basketball Team
Source: MDPI journal article supplement (doi:10.3390/brainsci13020238), 2023-01-31
Supplement: s1 [file s1]

**Supplementary Table S1.** Pairwise comparison statistics ( $P$  values and Cohen's  $d$  effect sizes) between night types for sleep variables.

| Sleep variable         | Comparison night type        | $P$ , Cohen's $d$ |                 |                              |              |                           |
|------------------------|------------------------------|-------------------|-----------------|------------------------------|--------------|---------------------------|
|                        |                              | Control           | After training  | After training, before games | Before games | After non-congested games |
| Total sleep time       | Control                      | -                 | -               | -                            | -            | -                         |
|                        | After training               | 1.00, -0.01       | -               | -                            | -            | -                         |
|                        | After training, before games | 0.02*, -0.68‡     | <0.001*, -0.68‡ | -                            | -            | -                         |
|                        | Before games                 | 1.00, -0.02       | 1.00, 0.07      | 0.002*, 0.69‡                | -            | -                         |
|                        | After non-congested games    | 0.30, -0.61‡      | 0.26, -0.61‡    | 1.00, 0.07                   | 0.30, -0.60‡ | -                         |
|                        | After congested games        | 0.77, -0.25       | 0.85, -0.24     | 0.02*, 0.43                  | 0.93, -0.23  | 0.83, 0.35                |
| Wake after sleep onset | Control                      | -                 | -               | -                            | -            | -                         |
|                        | After training               | 0.99, 0.08        | -               | -                            | -            | -                         |
|                        | After training, before games | 0.95, -0.12       | 0.81, -0.20     | -                            | -            | -                         |
|                        | Before games                 | 0.85, 0.52‡       | 0.90, 0.44      | 0.65, 0.67‡                  | -            | -                         |
|                        | After non-congested games    | 1.00, 0.00        | 1.00, -0.08     | 0.99, 0.12                   | 0.91, -0.54‡ | -                         |
|                        | After congested games        | 0.99, 0.20        | 1.00, 0.12      | 0.86, 0.32                   | 0.99, -0.32  | 0.93, 0.20                |
| Time in bed            | Control                      | -                 | -               | -                            | -            | -                         |
|                        | After training               | 0.93, 0.10        | -               | -                            | -            | -                         |
|                        | After training, before games | 0.70, -0.43       | 0.14, -0.54‡    | -                            | -            | -                         |
|                        | Before games                 | 1.00, 0.10        | 1.00, 0.00      | <0.001*, 0.54‡               | -            | -                         |
|                        | After non-congested games    | 0.57, -0.36       | 0.31, -0.47     | 1.00, 0.07                   | 0.73, -0.47  | -                         |
|                        | After congested games        | 1.00, -0.03       | 1.00, -0.13     | 0.88, 0.40                   | 1.00, -0.13  | 0.87, 0.33                |
| Efficiency             | Control                      | -                 | -               | -                            | -            | -                         |
|                        | After training               | 0.59, -0.15       | -               | -                            | -            | -                         |
|                        | After training, before games | 0.88, -0.25       | 1.00, -0.10     | -                            | -            | -                         |
|                        | Before games                 | 0.97, -0.22       | 1.00, -0.07     | 1.00, 0.03                   | -            | -                         |
|                        | After non-congested games    | 0.85, -0.21       | 1.00, -0.06     | 1.00, 0.04                   | 1.00, 0.01   | -                         |
|                        | After congested games        | 0.22, -0.33       | 0.93, -0.18     | 1.00, -0.08                  | 1.00, -0.11  | 0.99, -0.12               |
| Sleep onset            | Control                      | -                 | -               | -                            | -            | -                         |
|                        | After training               | 1.00, 0.05        | -               | -                            | -            | -                         |
|                        | After training, before games | 0.99, 0.08        | 1.00, 0.02      | -                            | -            | -                         |
|                        | Before games                 | 0.98, -0.16       | 0.68, -0.22     | 0.21, -0.24                  | -            | -                         |
|                        | After non-congested games    | 0.01*, -0.68‡     | 0.57, 0.63‡     | 0.23, 0.61‡                  | 0.14, 0.89   | -                         |
|                        | After congested games        | 0.99, 0.12        | 1.00, 0.07      | 1.00, 0.05                   | 0.79, 0.29   | 0.06, -0.56‡              |
| Sleep offset           | Control                      | -                 | -               | -                            | -            | -                         |
|                        | After training               | 1.00, -0.02       | -               | -                            | -            | -                         |
|                        | After training, before games | <0.001*, -0.76‡   | 0.003*, -0.76‡  | -                            | -            | -                         |
|                        | Before games                 | 1.00, -0.01       | 1.00, 0.01      | 0.007*, 0.79‡                | -            | -                         |
|                        | After non-congested games    | 1.00, -0.02       | 1.00, 0.00      | 0.007*, 0.77‡                | 1.00, -0.010 | -                         |
|                        | After congested games        | 1.00, -0.05       | 1.00, -0.03     | 0.002*, 0.74‡                | 1.00, -0.04  | 1.00, -0.03               |

*Note:* \*denotes significant pairwise difference. ‡ denotes medium effect for pairwise difference ( $d \geq 0.50$ ).
